# Supplementary material
Source: Springer Nature journal article supplement (https://www.springermedizin.de/resource/supplementary/12890_2010_270_MOESM3_ESM.pdf/9504830)

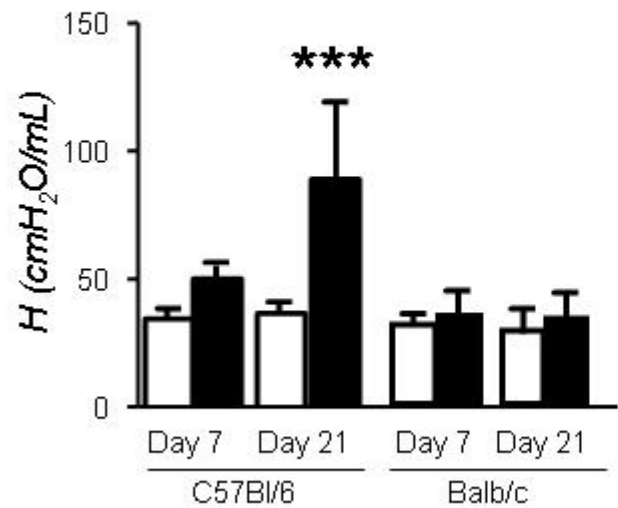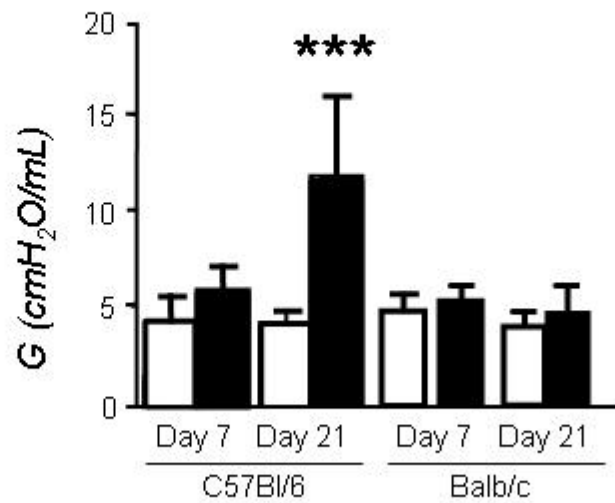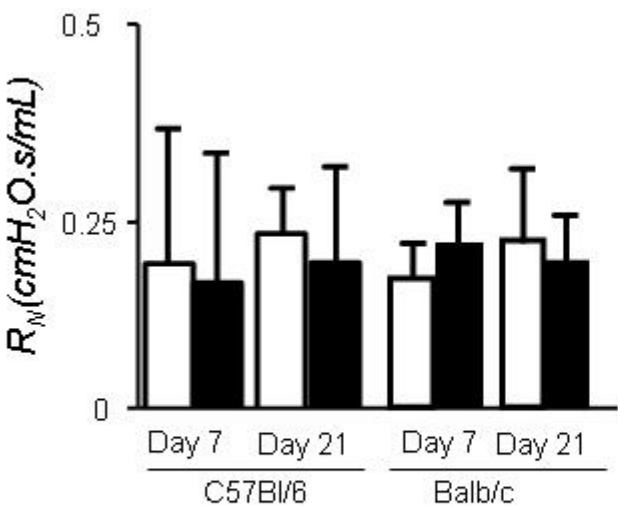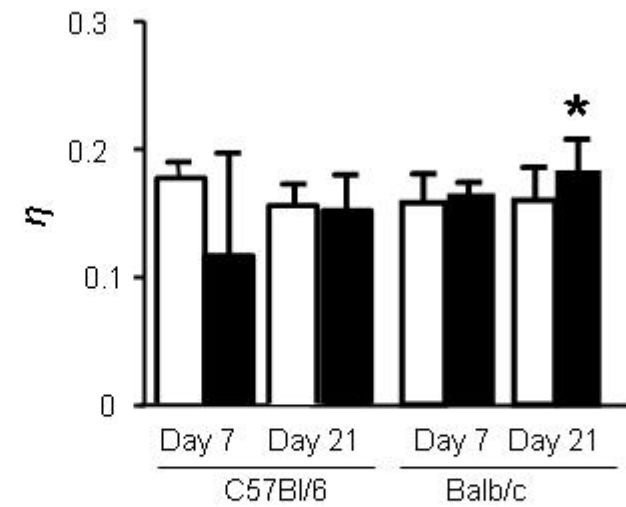

Supplement: MOESM3 [file 9504830]
